# Supplementary material for: Development of a Pan-Filoviridae SYBR Green qPCR Assay for Biosurveillance Studies in Bats
Source: MDPI journal article supplement (doi:10.3390/v15040987), 2023-04-17
Supplement: s1 [file s1]

Table S1. Publically available sequences used for primer design.

| Genbank accession number | Virus            | Host                       | Year | Country                      |
|--------------------------|------------------|----------------------------|------|------------------------------|
| KU182911                 | Bundibugyo virus | <i>Homo sapiens</i>        | 2007 | Uganda                       |
| KR063673                 | Bundibugyo virus | <i>Homo sapiens</i>        | 2007 | Uganda                       |
| NC_014373                | Bundibugyo virus | <i>Homo sapiens</i>        | 2007 | Uganda                       |
| MK028835                 | Bundibugyo virus | <i>Homo sapiens</i>        | 2007 | Uganda                       |
| MK028834                 | Bundibugyo virus | <i>Homo sapiens</i>        | 2007 | Uganda                       |
| KC545396                 | Bundibugyo virus | <i>Homo sapiens</i>        | 2012 | Democratic Republic of Congo |
| KC545395                 | Bundibugyo virus | <i>Homo sapiens</i>        | 2012 | Democratic Republic of Congo |
| KC545394                 | Bundibugyo virus | <i>Homo sapiens</i>        | 2012 | Democratic Republic of Congo |
| KC545393                 | Bundibugyo virus | <i>Homo sapiens</i>        | 2012 | Democratic Republic of Congo |
| MK028856                 | Bundibugyo virus | <i>Homo sapiens</i>        | 2007 | Uganda                       |
| NC_039345                | Bombali virus    | <i>Mops condylurus</i>     | 2016 | Sierra Leone                 |
| MT929366                 | Bombali virus    | <i>Mops pumilus</i>        | 2018 | Sierra Leone                 |
| MT929365                 | Bombali virus    | <i>Mops condylurus</i>     | 2018 | Guinea                       |
| MW056493                 | Bombali virus    | <i>Mops condylurus</i>     | 2019 | Kenya                        |
| MW056492                 | Bombali virus    | <i>Mops condylurus</i>     | 2019 | Kenya                        |
| MK340750                 | Bombali virus    | <i>Mops condylurus</i>     | 2018 | Kenya                        |
| MF319186                 | Bombali virus    | <i>Chaerephon pumilus</i>  | 2016 | Sierra Leone                 |
| MF319185                 | Bombali virus    | <i>Mops condylurus</i>     | 2016 | Sierra Leone                 |
| KR867676                 | Ebola virus      | <i>Homo sapiens</i>        | 1995 | Democratic Republic of Congo |
| AF086833                 | Ebola virus      | <i>Homo sapiens</i>        | 1976 | Democratic Republic of Congo |
| KR063671                 | Ebola virus      | <i>Homo sapiens</i>        | 1976 | Democratic Republic of Congo |
| KC242801                 | Ebola virus      | <i>Homo sapiens</i>        | 1976 | Democratic Republic of Congo |
| KC242791                 | Ebola virus      | <i>Homo sapiens</i>        | 1977 | Democratic Republic of Congo |
| KJ660348                 | Ebola virus      | <i>Homo sapiens</i>        | 2014 | Guinea                       |
| KJ660347                 | Ebola virus      | <i>Homo sapiens</i>        | 2014 | Guinea                       |
| KJ660346                 | Ebola virus      | <i>Homo sapiens</i>        | 2014 | Guinea                       |
| MH121168                 | Ebola virus      | <i>Homo sapiens</i>        | 1976 | Democratic Republic of Congo |
| MH121161                 | Ebola virus      | <i>Homo sapiens</i>        | 2014 | Sierra Leone                 |
| MG572234                 | Ebola virus      | <i>Homo sapiens</i>        | 2014 | Guinea                       |
| MK731988                 | Ebola virus      | <i>Homo sapiens</i>        | 2018 | Democratic Republic of Congo |
| MK163674                 | Ebola virus      | <i>Homo sapiens</i>        | 2018 | Democratic Republic of Congo |
| KP728283                 | Ebola virus      | <i>Homo sapiens</i>        | 2014 | Switzerland                  |
| KY426728                 | Ebola virus      | <i>Homo sapiens</i>        | 2015 | Sierra Leone                 |
| KM519951                 | Ebola virus      | <i>Homo sapiens</i>        | 2014 | Democratic Republic of Congo |
| KR006960                 | Ebola virus      | <i>Homo sapiens</i>        | 2015 | Liberia                      |
| KR006957                 | Ebola virus      | <i>Homo sapiens</i>        | 2014 | Liberia                      |
| KR006940                 | Ebola virus      | <i>Homo sapiens</i>        | 2014 | Liberia                      |
| KP271020                 | Ebola virus      | <i>Homo sapiens</i>        | 2014 | Democratic Republic of Congo |
| KP271019                 | Ebola virus      | <i>Homo sapiens</i>        | 2014 | Democratic Republic of Congo |
| KR006955                 | Ebola virus      | <i>Homo sapiens</i>        | 2014 | Liberia                      |
| MH613311                 | Ebola virus      | <i>Homo sapiens</i>        | 2017 | Democratic Republic of Congo |
| KT013256                 | Ebola virus      | <i>Homo sapiens</i>        | 2014 | Guinea                       |
| KT013254                 | Ebola virus      | <i>Homo sapiens</i>        | 2014 | Guinea                       |
| MK731994                 | Ebola virus      | <i>Homo sapiens</i>        | 2018 | Democratic Republic of Congo |
| MK731992                 | Ebola virus      | <i>Homo sapiens</i>        | 2018 | Democratic Republic of Congo |
| MG948591                 | Ebola virus      | <i>Homo sapiens</i>        | 2014 | Sierra Leone                 |
| MK163649                 | Ebola virus      | <i>Homo sapiens</i>        | 2018 | Democratic Republic of Congo |
| KY786009                 | Ebola virus      | <i>Macaca fascicularis</i> | 2001 | Gabon                        |
| MH470382                 | Ebola virus      | <i>Homo sapiens</i>        | 2015 | Guinea                       |
| KT357859                 | Ebola virus      | <i>Homo sapiens</i>        | 2015 | Sierra Leone                 |

|           |               |                                 |      |                              |
|-----------|---------------|---------------------------------|------|------------------------------|
| KY805812  | Ebola virus   | <i>Homo sapiens</i>             | 2014 | Sierra Leone                 |
| KY401672  | Ebola virus   | <i>Homo sapiens</i>             | 2014 | Guinea                       |
| KY401665  | Ebola virus   | <i>Homo sapiens</i>             | 2014 | Sierra Leone                 |
| KY744597  | Ebola virus   | <i>Homo sapiens</i>             | 2015 | Liberia                      |
| KY471124  | Ebola virus   | <i>Homo sapiens</i>             | 2001 | Gabon                        |
| KX013101  | Ebola virus   | <i>Homo sapiens</i>             | 2014 | Nigeria                      |
| KX013099  | Ebola virus   | <i>Homo sapiens</i>             | 2014 | Nigeria                      |
| KX013098  | Ebola virus   | <i>Homo sapiens</i>             | 2014 | Nigeria                      |
| KX013095  | Ebola virus   | <i>Homo sapiens</i>             | 2014 | Nigeria                      |
| KU220284  | Ebola virus   | <i>Homo sapiens</i>             | 2015 | Liberia                      |
| KU052670  | Ebola virus   | <i>Homo sapiens</i>             | 2015 | United Kingdom               |
| MZ541881  | Lloviu virus  | <i>Miniopterus schreibersii</i> | 2019 | Hungary                      |
| MW775011  | Lloviu virus  | <i>Miniopterus schreibersii</i> | 2019 | Hungary                      |
| MW775010  | Lloviu virus  | <i>Nycteribia schmidlii</i>     | 2019 | Hungary                      |
| NC_016144 | Lloviu virus  | <i>Miniopterus schreibersii</i> | 2003 | Spain                        |
| JF828358  | Lloviu virus  | <i>Miniopterus schreibersii</i> | 2003 | Spain                        |
| AY358025  | Marburg virus | <i>Homo sapiens</i>             | 1975 | South Africa                 |
| DQ217792  | Marburg virus | <i>Homo sapiens</i>             | 1980 | Kenya                        |
| KP985768  | Marburg virus | <i>Homo sapiens</i>             | 2014 | Uganda                       |
| KY047763  | Marburg virus | <i>Homo sapiens</i>             | 2005 | Angola                       |
| MG725616  | Marburg virus | <i>Rousettus aegyptiacus</i>    | 2013 | South Africa                 |
| JX458826  | Marburg virus | <i>Homo sapiens</i>             | 1999 | Democratic Republic of Congo |
| JX458850  | Marburg virus | <i>Homo sapiens</i>             | 2000 | Democratic Republic of Congo |
| DQ447651  | Marburg virus | <i>Homo sapiens</i>             | 1999 | Democratic Republic of Congo |
| JX458833  | Marburg virus | <i>Homo sapiens</i>             | 1999 | Democratic Republic of Congo |
| JX458858  | Marburg virus | <i>Rousettus aegyptiacus</i>    | 2009 | Uganda                       |
| JX458853  | Marburg virus | <i>Rousettus aegyptiacus</i>    | 2008 | Uganda                       |
| KC545388  | Marburg virus | <i>Homo sapiens</i>             | 2012 | Uganda                       |
| JX458856  | Marburg virus | <i>Rousettus aegyptiacus</i>    | 2009 | Uganda                       |
| JX458852  | Marburg virus | <i>Rousettus aegyptiacus</i>    | 2008 | Uganda                       |
| JX458854  | Marburg virus | <i>Rousettus aegyptiacus</i>    | 2009 | Uganda                       |
| JX458855  | Marburgvirus  | <i>Rousettus aegyptiacus</i>    | 2009 | Uganda                       |
| FJ743676  | Marburg virus | <i>Rousettus aegyptiacus</i>    | 2008 | Uganda                       |
| FJ750957  | Marburg virus | <i>Homo sapiens</i>             | 2007 | Uganda                       |
| FJ743675  | Marburg virus | <i>Hipposideros caffer</i>      | 2007 | Uganda                       |
| FJ743671  | Marburg virus | <i>Rousettus aegyptiacus</i>    | 2007 | Uganda                       |
| KU059750  | Marburg virus | <i>Homo sapiens</i>             | 2007 | Uganda                       |
| FJ750958  | Marburg virus | <i>Rousettus aegyptiacus</i>    | 2007 | Uganda                       |
| FJ750956  | Marburg virus | <i>Rousettus aegyptiacus</i>    | 2008 | Uganda                       |
| FJ750955  | Marburg virus | <i>Rousettus aegyptiacus</i>    | 2007 | Uganda                       |
| FJ750954  | Marburg virus | <i>Rousettus aegyptiacus</i>    | 2007 | Uganda                       |
| FJ750953  | Marburg virus | <i>Homo sapiens</i>             | 2007 | Uganda                       |
| EU068110  | Marburg virus | <i>Rousettus aegyptiacus</i>    | N/A  | Gabon                        |
| FJ743677  | Marburg virus | <i>Rousettus aegyptiacus</i>    | 2008 | Uganda                       |
| KX371887  | Mènglà virus  | <i>Rousettus aegyptiacus</i>    | 2015 | China                        |
| KU179482  | Ravn virus    | <i>Homo sapiens</i>             | 1987 | Kenya                        |
| JX458857  | Ravn virus    | <i>Rousettus aegyptiacus</i>    | 2009 | Uganda                       |
| KY798012  | Reston virus  | <i>Sus scrofa</i>               | 2009 | Philippines                  |
| KY798011  | Reston virus  | <i>Sus scrofa</i>               | 2008 | Philippines                  |
| KY798010  | Reston virus  | <i>Sus scrofa</i>               | 2008 | Philippines                  |
| KY798007  | Reston virus  | <i>Macaca fascicularis</i>      | 1992 | Italy                        |
| KY798005  | Reston virus  | <i>Macaca fascicularis</i>      | 1989 | United States of America     |
| KY798006  | Reston virus  | <i>Homo sapiens</i>             | 1989 | United States of America     |
| FJ621585  | Reston virus  | <i>Sus scrofa</i>               | 2008 | Philippines                  |
| KY008770  | Reston virus  | <i>Macaca fascicularis</i>      | 1989 | United States of America     |

|           |                              |                               |      |                          |
|-----------|------------------------------|-------------------------------|------|--------------------------|
| KY798009  | Reston virus                 | <i>Macaca fascicularis</i>    | 1996 | United States of America |
| MF540571  | Reston virus                 | <i>Macaca fascicularis</i>    | 2015 | Philippines              |
| JX477166  | Reston virus                 | <i>Macaca fascicularis</i>    | 1996 | United States of America |
| JX477165  | Reston virus                 | <i>Sus scrofa</i>             | 2009 | Philippines              |
| KR063670  | Sudan virus                  | <i>Homo sapiens</i>           | 2000 | Uganda                   |
| JN638998  | Sudan virus                  | <i>Homo sapiens</i>           | 2011 | Uganda                   |
| MH121169  | Sudan virus                  | <i>Homo sapiens</i>           | 2004 | Sudan                    |
| MH121163  | Sudan virus                  | <i>Homo sapiens</i>           | 2000 | Uganda                   |
| AY729654  | Sudan virus                  | <i>Homo sapiens</i>           | 2000 | Uganda                   |
| KR063670  | Sudan virus                  | <i>Homo sapiens</i>           | 2000 | Uganda                   |
| KC545392  | Sudan virus                  | <i>Homo sapiens</i>           | 2012 | Uganda                   |
| KC545390  | Sudan virus                  | <i>Homo sapiens</i>           | 2012 | Uganda                   |
| KC545391  | Sudan virus                  | <i>Homo sapiens</i>           | 2012 | Uganda                   |
| KC242783  | Sudan virus                  | <i>Homo sapiens</i>           | 1979 | Sudan                    |
| EU338380  | Sudan virus                  | <i>Homo sapiens</i>           | 2004 | Sudan                    |
| NC_006432 | Sudan virus                  | <i>Homo sapiens</i>           | 2000 | Uganda                   |
| FJ217162  | Taï Forest virus             | <i>Homo sapiens</i>           | 1994 | Cote d'Ivoire            |
| KP233864  | Bat related,<br>unclassified | <i>Rousettus leschenaulti</i> | 2013 | China                    |
