# Supplementary material for: Development of a Pan-Filoviridae SYBR Green qPCR Assay for Biosurveillance Studies in Bats
Source: MDPI journal article supplement (doi:10.3390/v15040987), 2023-04-17
Supplement: s1 [file s1]

10 20 30 40 50 60  
BOMV\_NC\_039345.1 ATGCCAACGATGCTGTTATCGCTAATTCAGTTGCTCAGGCACGCTTTTCAGGCTTGTGA  
BDBV\_KC545396 ATGCTAATGATGCCGTCAATTGCCAACTCTGTAGCTCAAGCTCGTTTTCTCCGGATTGTTGA  
LLOV\_NC\_016144 ATGCTAATGATGCAATCATTGCCAATTCAAATATCCCAAACACGATTTTCAGGATTGTTAA  
MARV\_MG725616 ATGCCTATGACAGTATCATCAGTAATTCAGTAGGTCAAACTAGATTCTCAGGACTTCTTA  
MLAV\_KX371887 ATGCCTATGACAATGTCATCAGCAATTCATAAAACCAAACACGTTTCTCAGGACTGCTGA  
RESTV\_JX477165 ATGCCAATGATGCTGTCATTGCTAATTCAGTTGCTCAGGCTCGTTTTTCAGGACTCCTAA  
SUDV\_KC545391 ATGCGAACGACACAGTAATATCTAATTTCTGTTGCCAAGCAAGGTTCTCTGGTCTTCTGA  
TAFV\_MH121167 ATGCTAACGATGCTGTCATCGCAAACCTCTGTAGCTCAAGCACGTTTTTCAGGATTATTGA  
EBOV\_MG572235 ATGCCAACGACGCTGTGATTTCAAATTCAGTGGCTCAAGCTCGTTTTTCAGGTTTATTGA  
Filo Forward  
Filo Reverse  
Control tag\_FVQPCR  
SP6\_complement

70 80 90 100 110 120  
BOMV\_NC\_039345.1 TCGTCAAGACAGTGGTGGACCACATTCGTCAGAAAAACAGACCGTGGAGTCCGTCCTTCATC  
BDBV\_KC545396 TAGTCAAAACAGTGTGATCATATCCTCCAAAAAACAGAGCACGGAGTTCGCCTGCATC  
LLOV\_NC\_016144 TCGTGAAGACTGTCTAGAGCATATTCCTCCAAAAAACCTGAGGCAGGGGTCCAACCTTCATC  
MARV\_MG725616 TTGTGAAAAACAGTTCTCGAGTTTCATCTTCGAAAAAACCTGATTTCAGGGGTGACACTACATC  
MLAV\_KX371887 TTGTAAAGACTGTCTTGGAAACATATCCTCCAAAGGACTGAAAATGGAGTCATTTCCACC  
RESTV\_JX477165 TTGTCAAAAACCGTTCTTGACCATATTCCTGCAAAAAACCGACCAAGGAGTAAGACTTCACC  
SUDV\_KC545391 TTGTAAAGACTGTTCTGGACCACATCCTACAAAAACCGATCTTGGAGTACGACTTCATC  
TAFV\_MH121167 TCGTTAAAAACAGTGTAGATCACATCCTTCAGAAAAACAGAGCACGGAGTGCCTTTCATC  
EBOV\_MG572235 TTGTCAAAACAGTACTTGATCATATCCTACAAAAGACAGAACCGGGAGTTCGTCTCCATC  
Filo Forward  
Filo Reverse  
Control tag\_FVQPCR  
SP6\_complement

130 140 150 160 170 180  
BOMV\_NC\_039345.1 CTTTAGCACGTACAGCCAAGGTCAGGAACGAGGTCCATTTCGTTCAAAGCTGCTCTTAACT  
BDBV\_KC545396 CCTTGGCGCAACAGCCAAAGTCAAAAAATGAGGTAAGCTCTTTTAAGGCCGCTTTAGCCT  
LLOV\_NC\_016144 CATTAGCTCGAACCTCGAAAGTCAAAAGGAGAACTCCTTGCATTCAAATCAGCACTGGAAG  
MARV\_MG725616 CTTTGGTGGGACCTCCAAAGTAAAAAATGAAGTTGCTAGTTTCAAGCAGGCGTTGAGCA  
MLAV\_KX371887 CTCTTGTGCAAGCTCCAAAGTGAAGAGTGAAGTTGAGACTTCAAAGTTGCATTGAGAG  
RESTV\_JX477165 CTTTGGCCCAGAACCCAAAGTGCAGTAATGAGGTTAATGCATTTAAGGCCGCCCTAAGCT  
SUDV\_KC545391 CACTGGCCAGGACAGCAAAAGTCAAGAATGAGGTGAGTTTCAAGGAGCTCTTGGCT  
TAFV\_MH121167 CTTTGGCAAGAACTGCTAAGGTCAAGAACGAAGTAAATTCCTTTAAGGCTGCCCTTAGCT  
EBOV\_MG572235 CTCTTGCAGGACCGCCAAGGTAAAAAATGAGGTGAACCTCTTTAAGGCTGCACTCAGCT  
Filo Forward  
Filo Reverse  
Control tag\_FVQPCR  
SP6\_complement

190 200 210 220 230 240  
BOMV\_NC\_039345.1 CCTTGGCTCAGCATGGGGAATATGCCCCCTTTGCTCGACTTTTAAACCTtcggttcaacct  
BDBV\_KC545396 CACTAGCACAAACATGGAGAATATGCCCCGTTTCGCTCGTCTGCTGAATCttcggttcaacct  
LLOV\_NC\_016144 CGTTGGCCTCACACAGAGAGTATGCACCAATTTGCACGGCTCTTGAACCTtcggttcaacct  
MARV\_MG725616 ACCTAGCCCCGACATGGAGAATACGCACCATTTGCACGGGTTCTGAATTTtcggttcaacct  
MLAV\_KX371887 GTCTGGCAAGACACAAGAATACGCACCTTTTGCACGGGTTATTGAACttcggttcaacct  
RESTV\_JX477165 CACTTGTAAACACGGGGAATATGCCCCCTTTGCTCGCCTTCTCAATCttcggttcaacct  
SUDV\_KC545391 CACTTGCCAAGCATGGAGAATATGCTCCATTTGCACGCTCTCCTCAATCttcggttcaacct  
TAFV\_MH121167 CGCTAGCACAAACATGGAGAGTATGCTCCTTTTGCCTTGTGCTGAATCttcggttcaacct  
EBOV\_MG572235 CCCTGGCCAAGCATGGAGAGTATGCTCCTTTTGCACGACTTTTGAACCTtcggttcaacct  
Filo Forward  
Filo Reverse  
Control tag\_FVQPCR  
SP6\_complement

GRGARTAYGCNCCNTTYGC

ttcggttcaacct

SP6\_complement

250 260 270 280 290 300

BOMV\_NC\_039345.1 tgtcgtTCGAACATGGGCTGTATCCTCAACTCTCTGCAATTGCAC TTGGTGTGGCTACTG
BDBV\_KC545396 tgtcgtTTT GAGCATGGGCTTTTCCCTCAACTTTCTGCAATTGCTTTGGGAGTAGCAACTG
LLOV\_NC\_016144 tgtcgtTAGAACATGGCCTGTATCCTCAGCTCTCTGCCATCGCGCTTGGAGTTGCTACAG
MARV\_MG725616 tgtcgtTCGAGCATGGACTCTATCCTCAGCTCTCAGCAATTGCGCTGGGTGTGGCTACAG
MLAV\_KX371887 tgtcgtTTT GAGCATGGACTTTTCCCTCAACTCTCAGCAATTGCAATCGGGGTGCAACAG
RESTV\_JX477165 tgtcgtTTTGAACATGGTCTCTACCCACAGTTATCAGCAATTGCTCTTGGAGTTGCCACAG
SUDV\_KC545391 tgtcgtTTGGAACATGGGCTTTATCCACAACCTCTCAGCCATTGCTTTGGGTGTTGCAACTG
TAFV\_MH121167 tgtcgtTCGAGCACGGACTGTTTCTCAGCTTTCTGCAATTGCCCTAGGTGTGCGAACGG
EBOV\_MG572235 tgtcgtTTT GAGCATGGTCTTTTCCCTCAACTATCAGCAATTGCAC TCGGAGTCGCCACAG

Filo Forward

Filo Reverse

Control tag\_FVQPCR tgtcgt

SP6\_complement

310 320 330 340 350 360

BOMV\_NC\_039345.1 CACACGGCAGCAGCTTTGGCAGGGGTGAATGTTGGT GAGCAGTACCAACAGCTCAGGGAGG
BDBV\_KC545396 CACATGGGAGCAGCTCTGGCAGGAGTCAATGTAGGAGAGCAATACCAACAAC TCGGAGAAG
LLOV\_NC\_016144 CT CATGGT TAGCACACTAGCAGGAGTTAATGTGAGTGAACAATAC CAGCAACTCCGAGAGG
MARV\_MG725616 CACACGGCAGCACATTTGGCTGGTGTCAATGTCGGCGAACAA TATCAACAGCTACGAGAGG
MLAV\_KX371887 CACATGGAAGTACATTTGGCTGGGGTGAGTGTGGAGAGCAGTATCAACAAC TACGGGAAG
RESTV\_JX477165 CACATGGT TAGCACCTTTCAGGAGTTAATGTTGGT GAGCAGTATCAGCAGCTCAGAGAGG
SUDV\_KC545391 CCCACGGGAGCAGCTGGCTGGTGTTAATGTAGGGGAGCAATATCAGCAACTGCGT GAGG
TAFV\_MH121167 CACACGGCAGTACCCTGGCAGGAGTAAATGTGGGGGAACAGTATCAGCAACTACGAGAAG
EBOV\_MG572235 CACACGGGAGTACCCTCGCAGGAGTAAATGTTGGAGAACAGTATCAACAAC TCGAGAGG

Filo Forward

Filo Reverse

ggngarcartaycarcarct

Control tag\_FVQPCR

SP6\_complement

370 380 390 400 410 420

BOMV\_NC\_039345.1 CTGCCACGGAGGCTGAGAAGCAGCTGCAGCAATATGCTGAAACACGTGAGCTGGACC ACT
BDBV\_KC545396 CAGCCACTGAGGCCGAAAAGCAGTTGCAGAAATATGCTGAATCTCGTGAAC TTGATCACC
LLOV\_NC\_016144 CTGCAACAGAGGCTGAGAAA CAATTACAACAGCAGCTCAGAGATGCGGGAATTTGGAGACC
MARV\_MG725616 CTGCATGATGCAGAGGTAAAATTACAAGGCAGCATGAACATCAGGAAATTTCAAGCTA
MLAV\_KX371887 CAGCCCATGATGCAGAACTTAAACTCCAGAGGCGCCGTGAACAAATGGAAATTT CATCAC
RESTV\_JX477165 CTGCCACTGAAGCTGAGAAGCAACTCCAACAATATGCTGAGTCCAGAGA ACTCGACAGCC
SUDV\_KC545391 CTGCTACTGAAGCTGAAAAGCAACTCCAACAATATGCTGAGACACGTGAGTTGGACAACC
TAFV\_MH121167 CAGCCACTGAGGCAGAAAA CAATTGCAGAAATACGCTGAATCTCGCGAGCTTGACCATC
EBOV\_MG572235 CTGCCACTGAGGCTGAGAAGCAACTCCAACAATACGCAGAGTCTCGGAACTTGACCATC

Filo Forward

Filo Reverse

Control tag\_FVQPCR

SP6\_complement

430 440 450 460 470 480

BOMV\_NC\_039345.1 TAGGCCTAGACACAAAAGAAAAGGAAATATTAATGAATTTCCATCAACGGAAAAATGAGA
BDBV\_KC545396 TAGGTCTTGATGATCAGGAAAAGAAAATCCTAAAAGACTTCCATCAGAAAAAGAATGAGA
LLOV\_NC\_016144 TTGGACTGGATGAACAAGAAAGGAAGATCCTTGCAACATTTCCACTCCCGGAAAAATGAGA
MARV\_MG725616 TTGCCGAAGATGACGAGGAAAGGAAGATATTAGAACAGTTCCACCTTCAAAAAACTGAAA
MLAV\_KX371887 TCGAACCTTGACCTTGAAGAACAGAAAATTTCTGGAACAATTCATCAGCAGAAAAACAGAAA
RESTV\_JX477165 TAGGCCTAGACGATCAGGAAAAGAAAATACTTAATGAACCTTCCATCAGAAAAAATGAAA
SUDV\_KC545391 TTGGGCTTGATGAGCAGGAAAAGAAAGATTCTCATGAGCTTCCACCAGAAGAAGAATGAGA
TAFV\_MH121167 TAGGTCTCGATGATCAAGAGAAGAAGATCTTGAAAGACTTCCATCAGAAAGAAAAATGAAA
EBOV\_MG572235 TTGGACTTGATGATCAGGAAAAGAAAATTTTATGAACCTTCCATCAGAAAAAGAACGAAA

Filo Forward

Filo Reverse

Control tag\_FVQPCR

SP6\_complement

-----  
490 500 510 520 530 540  
.....|.....|.....|.....|.....|.....|.....|.....|.....|.....|.....|.....|

BOMV\_NC\_039345.1 TTAGTTTCCAGCAAACAAATGCAATGGTGTCCCTTCGCAAGGAGAGACTAGCAAACcgc  
BDBV\_KC545396 TCAGCTTCCAGCAGACGACAGCCATGGTCACACTGCGGAAAGAGAGATTGGCCAAATcgc  
LLOV\_NC\_016144 TCAACATTCAACAGACCAGCTCGATATTAGCAATTCGTAAGGAACGACTCCGCAAGCgc  
MARV\_MG725616 TCACACACAGTCAGACACTTGCCGTCCCTCAGCCAGAAACGAGAAAAATTAGCTCGTCgc  
MLAV\_KX371887 TAACTCACACACAGACTCTTGCTGTTCTAACACAGAAGAAAAGAAAAGTTAGCCAAACcgc  
RETV\_JX477165 TTAGTTTCCAGCAGACCAATGCAATGGTCACCCCTTAGGAAAGAGCGACTGGCTAAATcgc  
SUDV\_KC545391 TCAGCTTCCAGCAAACAACTAACGCAATGGTAACCTTGAGGAAAGAGCGGCTGGCCAAACcgc  
TAFV\_MH121167 TCAGCTTCCAGCAGACAACAGCCATGGTCACACTACGGAAGGAAAGGCTAGCCAAGCgc  
EBOV\_MG572235 TCAGCTTCCAGCAAACAAACGCTATGGTAACCTAAGAAAAGAGCGCTGGCCAAAGCgc

Filo Forward

Filo Reverse

Control tag\_FVQPCR

SP6\_complement

-----cgc  
550 560 570  
.....|.....|.....|.....|.....|.....|

BOMV\_NC\_039345.1 ttctatagtgtcacctaataagaataactct  
BDBV\_KC545396 ttctatagtgtcacctaataagaataactct  
LLOV\_NC\_016144 ttctatagtgtcacctaataagaataactct  
MARV\_MG725616 ttctatagtgtcacctaataagaataactct  
MLAV\_KX371887 ttctatagtgtcacctaataagaataactct  
RETV\_JX477165 ttctatagtgtcacctaataagaataactct  
SUDV\_KC545391 ttctatagtgtcacctaataagaataactct  
TAFV\_MH121167 ttctatagtgtcacctaataagaataactct  
EBOV\_MG572235 ttctatagtgtcacctaataagaataactct

Filo Forward

Filo Reverse

Control tag\_FVQPCR

SP6\_complement

ttctatagtgtcacctaata
